# Supplementary material for: Insight into ion dynamics in a NaClO4-doped polycaprolactone solid polymer electrolyte for solid state batteries
Source: Royal Society of Chemistry journal article supplement (doi:10.1039/d4cp01360c), 2024-01-01
Supplement: d4cp01360c1.pdf [file d4cp01360c1.pdf]

**Supporting information for**

**Insight into ion dynamics in NaClO<sub>4</sub> doped Polycaprolactone solid  
polymer electrolyte for solid state batteries**

Supriya K Shetty<sup>a</sup>, Ismayil<sup>a\*</sup>, Pradeep Nayak<sup>a</sup>, Y. N. Sudhakar<sup>b</sup>, Kuldeep Mishra<sup>c</sup>, Shahid  
Bashir<sup>d</sup>, Ramesh Subramaniam<sup>e</sup>

<sup>a</sup>Department of Physics, Manipal Institute of Technology, Manipal Academy of Higher  
Education, Manipal 576104, Karnataka, India

<sup>b</sup>Department of Chemistry, Manipal Institute of Technology, Manipal Academy of Higher  
Education, Manipal 576104, Karnataka, India

<sup>c</sup>Symbiosis Institute of Technology, Symbiosis International (Deemed University), Pune,  
Maharashtra 412115, India

<sup>d</sup>Higher Institution Centre of Excellence (HiCoE), UM Power Energy Dedicated Advanced  
Centre (UMPEDAC), Level 4, Wisma R&D, Universiti Malaya, Jalan Pantai Baharu, 59990  
Kuala Lumpur, Malaysia

<sup>e</sup>Centre for Ionics Universiti Malaya, Department of Physics, Faculty of Science, Universiti  
Malaya, 50603, Kuala Lumpur, Malaysia

*\*Corresponding Author email: ismayil.mit@manipal.edu; ismayil.486@gmail.com*

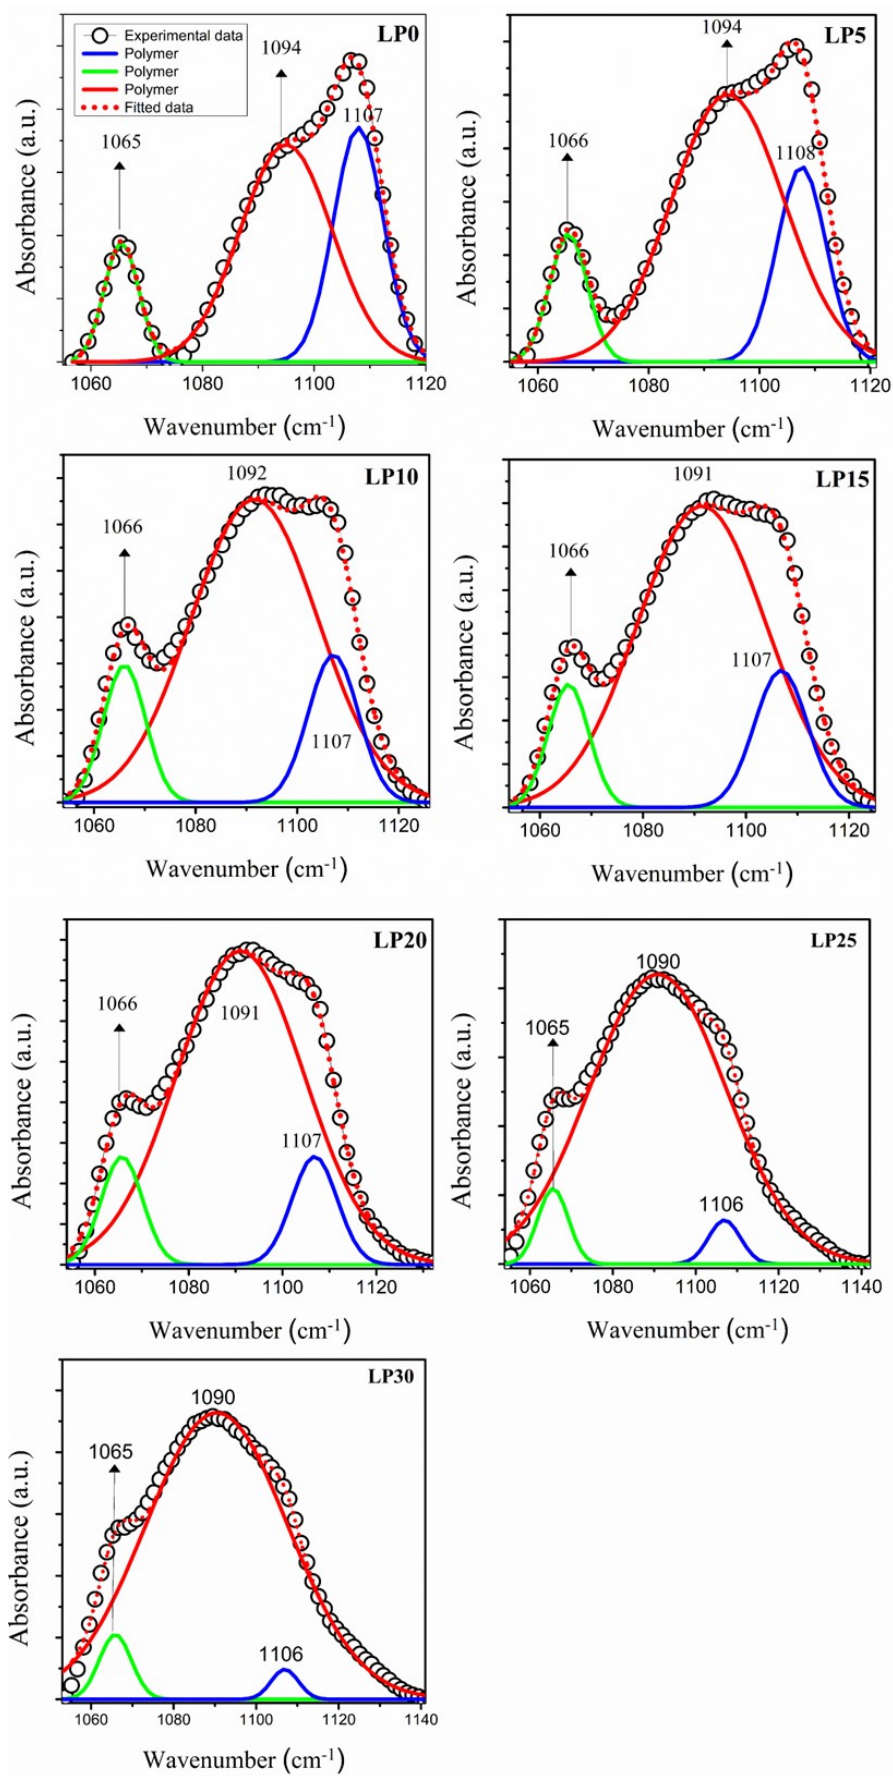

**Fig. S1** FTIR deconvoluted spectra at 1200-1000 cm<sup>-1</sup> region.

**Table 1S.** Variation of ionic conductivity of LP30 sample at different temperatures

| Temperature (°C) | Ionic conductivity of LP30 sample (S cm <sup>-1</sup> ) |
|------------------|---------------------------------------------------------|
| 25               | 1.02E-05                                                |
| 30               | 1.05E-05                                                |
| 35               | 1.07E-05                                                |
| 40               | 1.09E-05                                                |
| 45               | 1.10E-05                                                |
| 50               | 1.11E-05                                                |
| 55               | 1.20E-05                                                |
| 60               | 1.60E-05                                                |

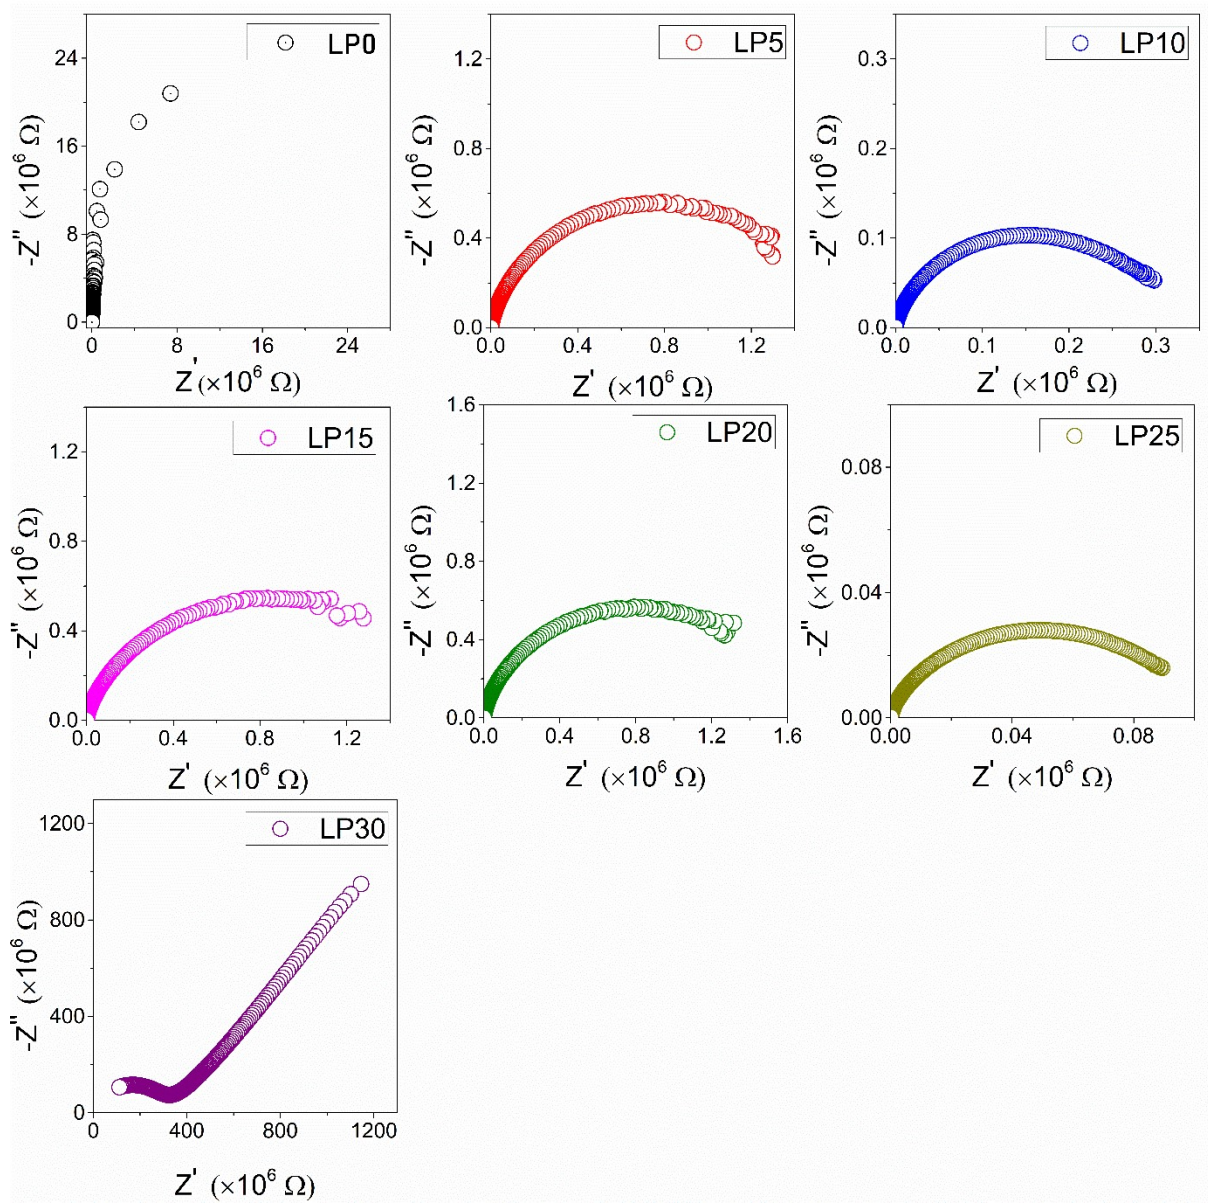

**Fig. S2** Nyquist plot of samples at 25°C.

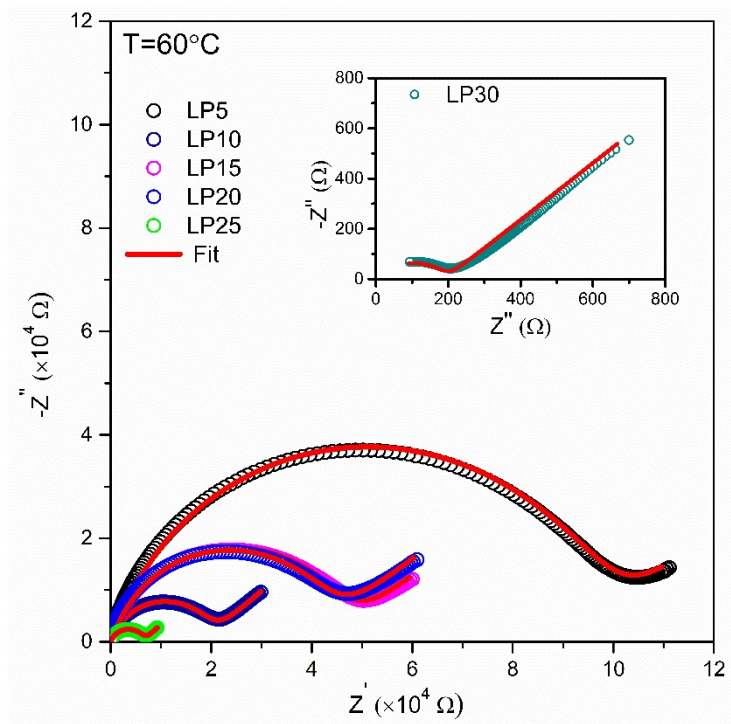

**Fig. S3** Nyquist plot of doped samples at  $60^{\circ}\text{C}$ .
